# Supplementary material
Source: publisher figshare collection journal article supplement (https://tandf.figshare.com/ndownloader/files/22666379)
Supplement: Supplementary file 1 [file 22666379]

## Supplementary material

### Uncertainty assessment in river flow projections for Ethiopia's Upper Awash Basin using multiple GCMs and hydrological models

W.C.H. Chan *et al.*

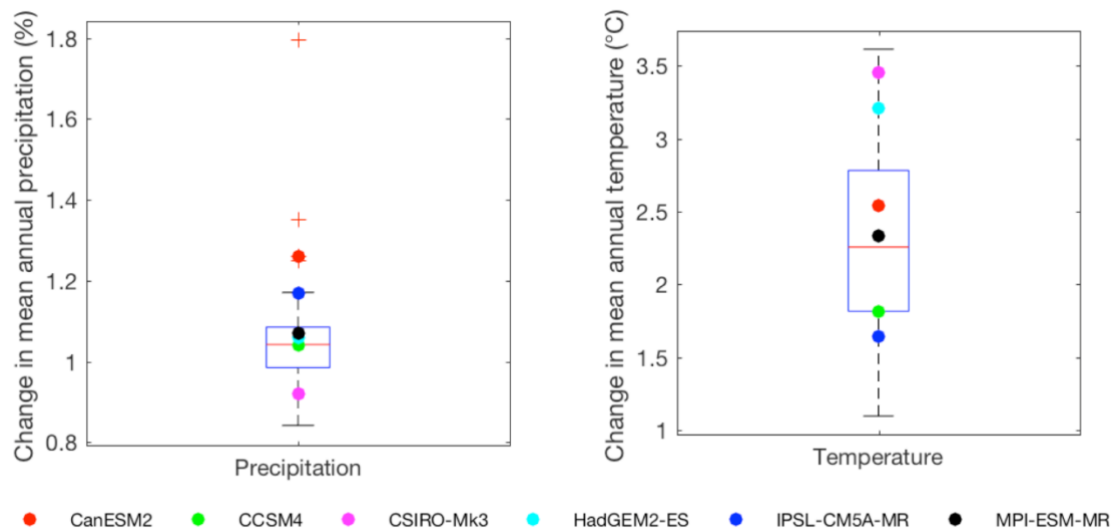

**Figure S1.** Boxplots of delta factors for annual mean precipitation (%) and annual mean temperature (°C) over the Upper Awash Basin for all CMIP5 GCMs and the six selected GCMs.

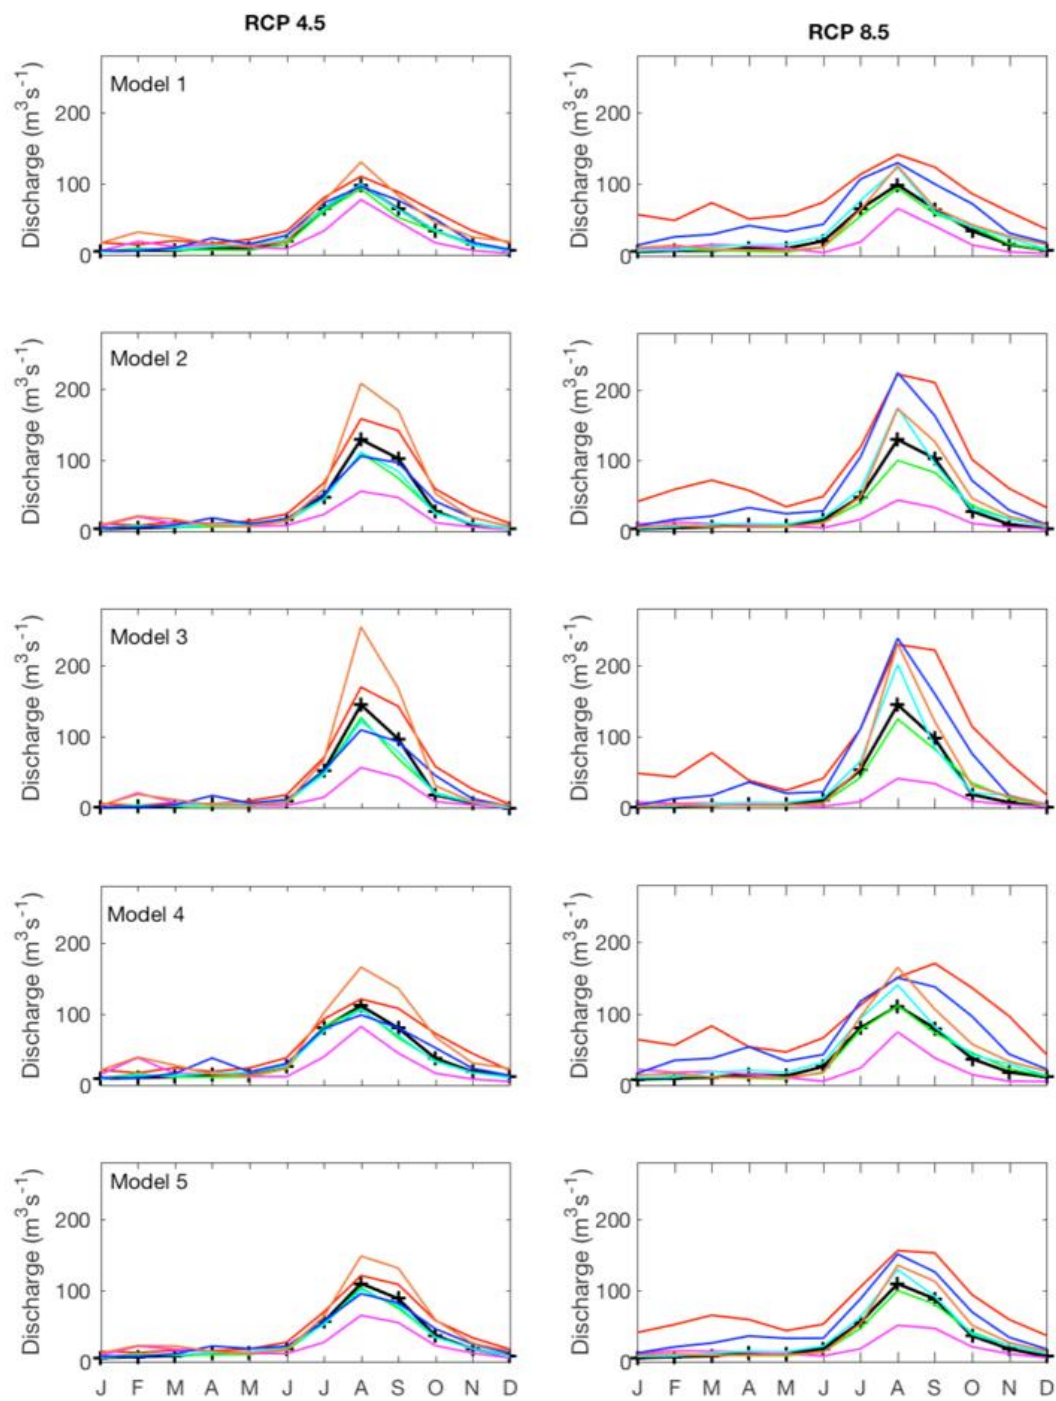

**Figure S2.** Baseline and simulated river regimes at Melka for each GCM and hydrological model under the RCP4.5 and RCP8.5 scenarios.

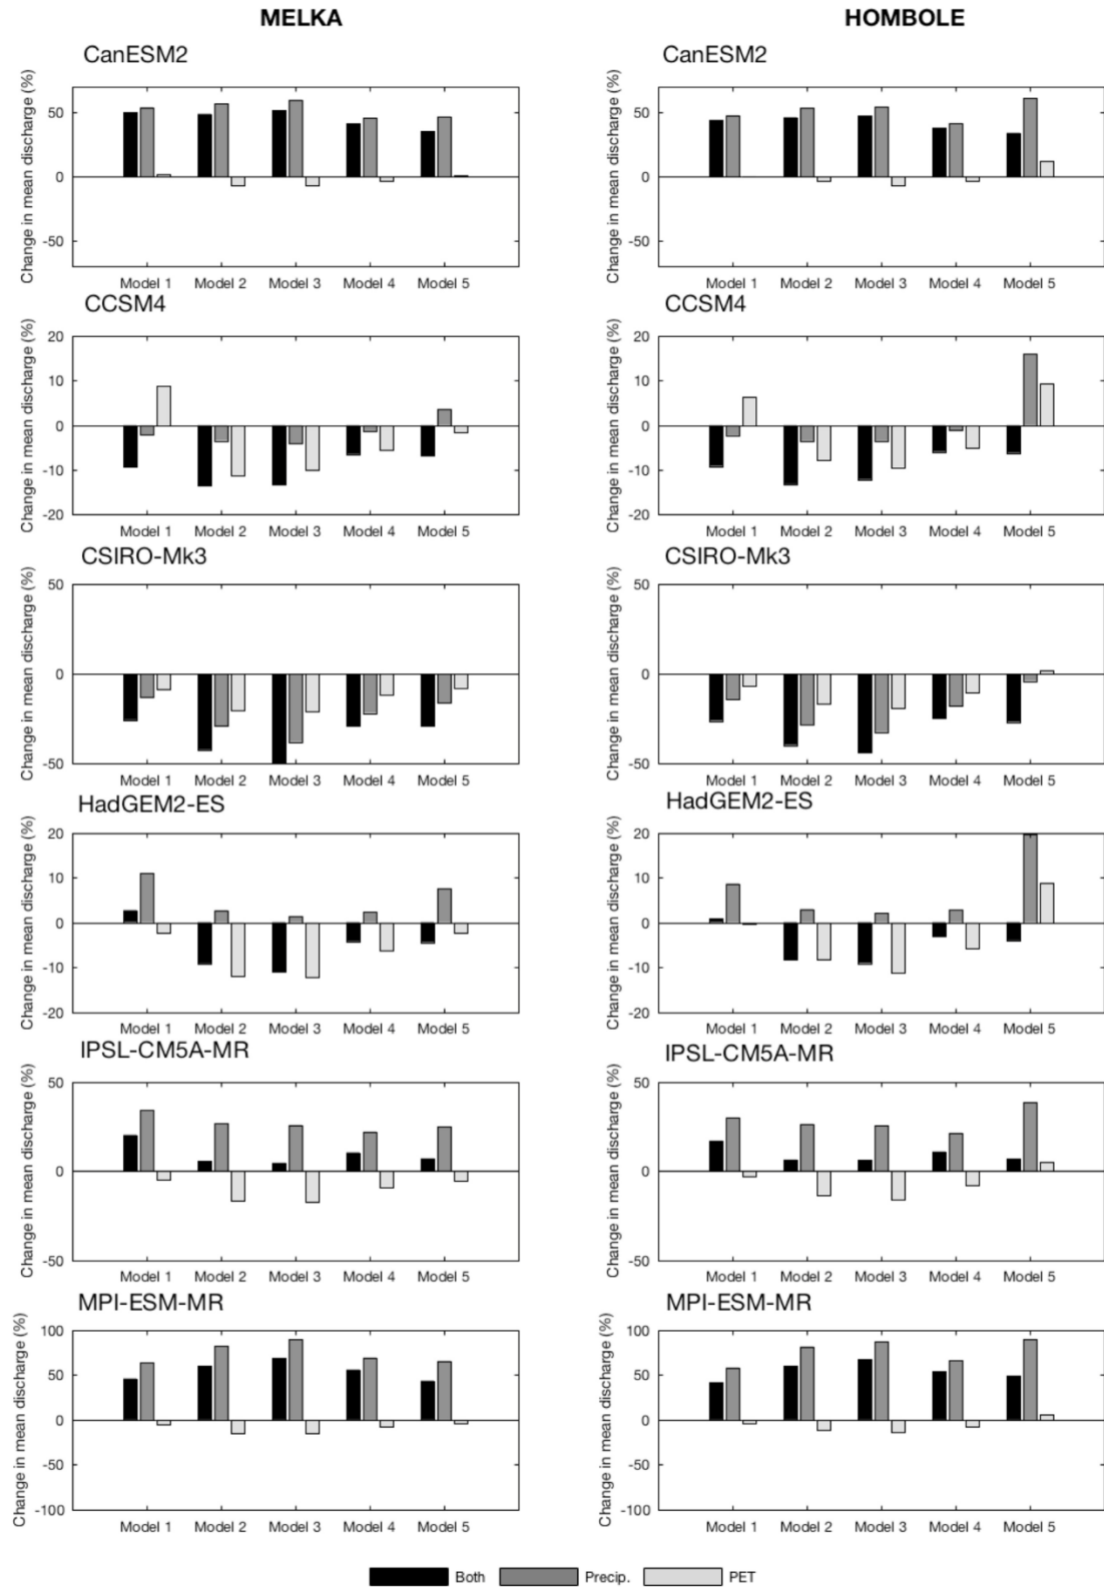

**Figure S3.** Percentage change in mean discharge at Melka and Hombole simulated by each hydrological model from the combined and individual application of scenario precipitation and PET for the six GCMs and the RCP4.5 scenario.

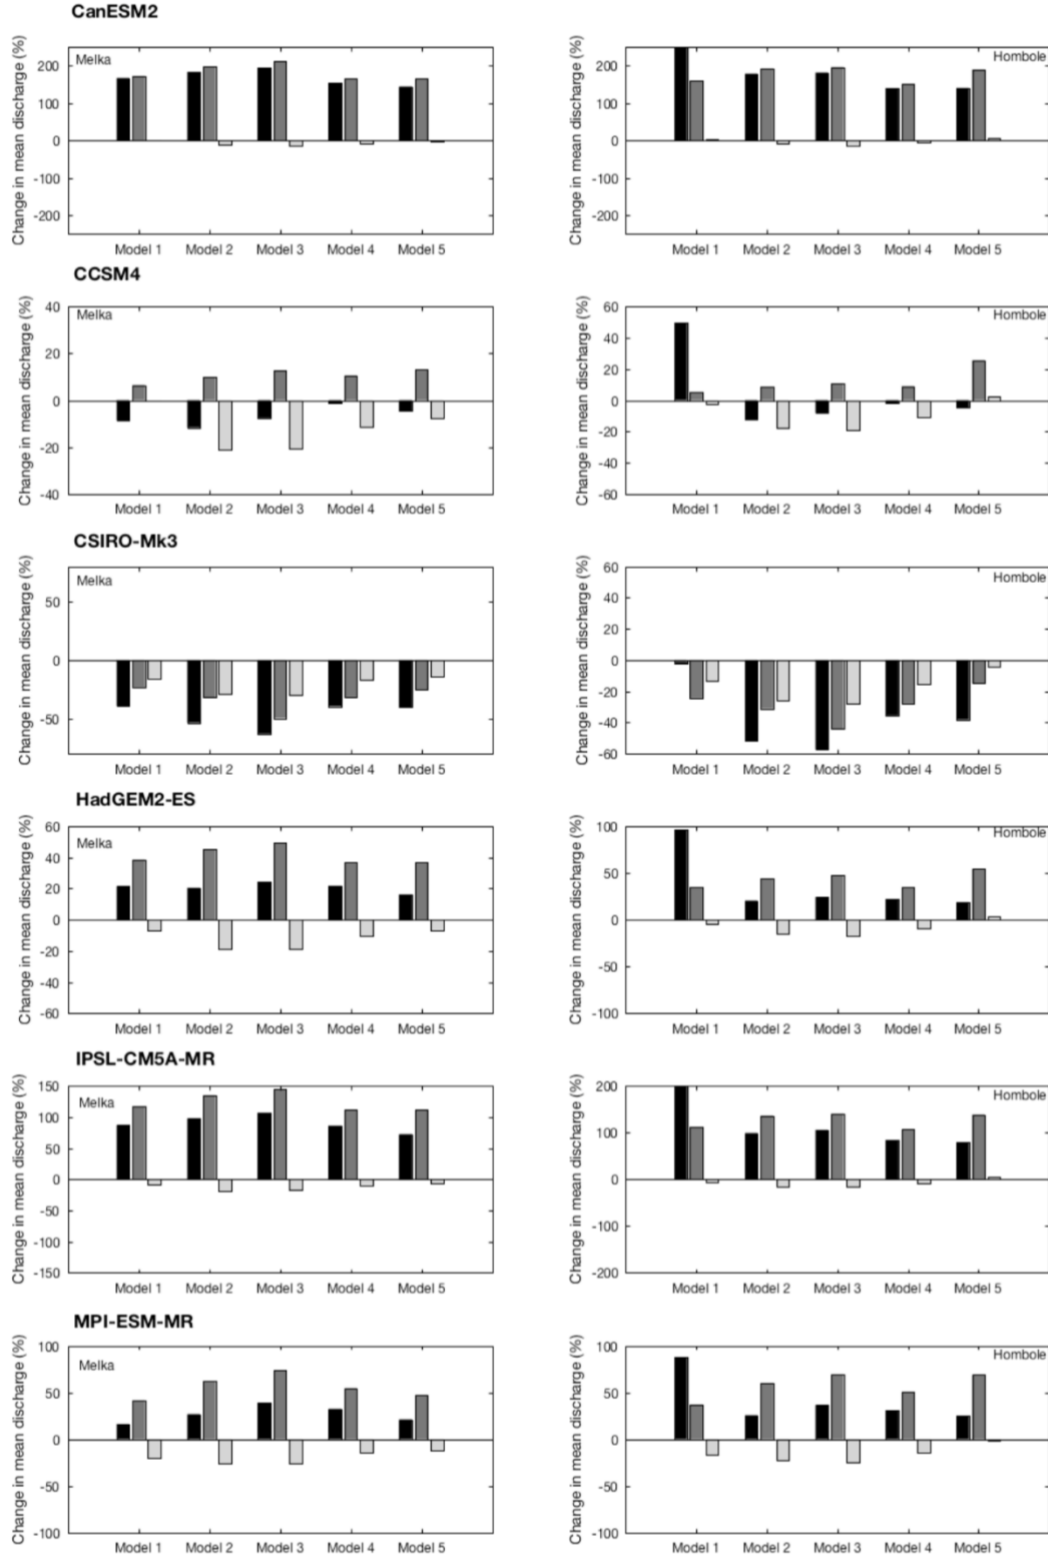

**Figure S4.** Percentage change in mean discharge at Melka and Hombole simulated by each hydrological model from the combined and individual application of scenario precipitation and PET for the six GCMs and the RCP8.5 scenario.
